# Supplementary material for: Assessment of left ventricular function by pulse wave analysis in critically ill patients
Source: Springer Nature journal article supplement (doi:10.1007/s00134-013-2861-8), 2013-03-08
Supplement: MOESM1 [file 8122246]

**ASSESSMENT OF LEFT VENTRICULAR FUNCTION BY PULSE WAVE ANALYSIS IN CRITICALLY ILL PATIENTS**

**Sabino Scolletta, Laurent Bodson, Katia Donadello, Fabio S Taccone,**

**Alessandro Devigili, Jean-Louis Vincent, Daniel De Backer**

Department of Intensive Care, Erasme University Hospital,

Université Libre de Bruxelles, Brussels, Belgium

**(Electronic Supplementary Material)**

**Content:**

Cardiac Cycle Efficiency (CCE): what does it represent Pages 3-5

Electronic Table 1: Stroke volume (SV) estimated by three methods Page 6

Electronic Table 2: Agreement of SV estimated by the three methods Page7

Electronic Figure 1: Computation of arterial pressure dP/dt dtMAX Page 8

Electronic Figure 2: Relation between LVEF and CCE (normal LV function) Page 9

Electronic Figure 3: Relation between LVEF and CCE (decreased LV function) Page 10

Electronic Figure 4: Relation between Ea/Ees and CCE Page 11

Electronic Figure 5: Relation between LVEF and CCE (septic patients) Page 12

Electronic Figure 6: Relation between dP/dt by echocardiography and PWA (septic patients) Page 13

Electronic Figure 7: Relation between Ea/Ees and CCE in septic patients Page 14

Electronic Figure 8: Relation between LVEF and CCE (low SVR) Page 15

Electronic Figure 9: Relation between dP/dt by echocardiography and PWA (low SVR) Page 16

Electronic Figure 10: Relation between Ea/Ees and CCE in patients with low SVR Page 17

Electronic Figure 11: Relation between LVEF and CCE (norepinephrine treated patients) Page 18

Electronic Figure 12: Relation between dP/dt by echocardiography and PWA (norepinephrine) Page 19

Electronic Figure 13: Relation between Ea/Ees and CCE in patients under norepinephrine Page 20

Electronic Figure 14: Underdamped arterial pressure waveform (example 1) Page 21

Electronic Figure 15: Underdamped arterial pressure waveform (example 2) Page 22

Electronic Figure 16: Optimally damped arterial pressure waveform Page 23

Electronic Figure 17: Measurement of cardiac cycle efficiency (CCE) by pulse wave analysis Page 24

**Cardiac Cycle Efficiency (CCE): what does it represent and how is it measured?**

*Basic physiological principles of CCE*

In a cardiac cycle, the energy required to generate a given stroke volume depends on the interaction between pump function and the arterial system (i.e., ventricular-arterial (V-A) coupling) [E1, E2, E3]. The factors implicated in the arterial component are arterial elastance and reflected waves. Reflected waves are composed of a multitude of wavelets generated by reflection of previous beats at branchpoints and distal resistive arterioles (backward waves) but also at the aortic valve (forward waves). Depending on their timing according to aortic valve closure and direction, the energy generated by reflected waves can either increase heart work (counted as a negative component in CCE) or facilitate ejection (counted as a positive component in CCE) [E4]. The ratio of systolic energy to total energy expenditure is reflected in the CCE variable.

CCE is measured by the analysis of the arterial waveform because stroke volume, arterial elastance and reflected waves all affect the arterial waveform [E4-E6].

*Basic principles of CCE measurement from arterial signal*

To compute CCE for each cardiac cycle, a number of systolic-phase pressure points (i.e., systolic powers W1, W2, W3…, expressed in mmHg/msec) are generated, each representing the energy related to stroke volume and one or several reflected waves (the number of these is variable and depends on aortic elastance and vascular tone). The same approach is also conducted for the whole beat (W1, W2, W3, W4…), which comprises at least one more component related to aortic recoil, but reflected waves may also add other components, if significant. CCE is computed as the ratio of the sum of systolic powers to the sum of all the power of the entire cycle [E6] (Electronic Figure 17). Sums or subtractions of different energies represent the positive or negative effects that physical factors (e.g., pump function, arterial elastance, forward and backward reflected waves) have on the whole cardiac cycle. Each power (W) has a positive value, but the final result (the “efficiency”) could be positive with a maximal value of 1, null, or negative. It could potentially also be equal to - ∞ if the total power equals 0; but this condition occurs only in circumstances close to cardiac arrest-no flow.

This “efﬁciency” as opposed to the purely “mechanical performance”, which is always >0 and <1, can also have negative values. CCE may trend toward negative values, indicating a lower “efficiency” of the cardiovascular system, when the energy expenditure (i.e., the energetic compensation) increases in order to compensate for the increased forces acting against ejection, to maintain the interplay between the pump and the vascular system [E6].

CCE is always less than unity, because an “ideal system” does not exist and part of the energy is always dispersed by the system during its production. As the cardiovascular system increases its energy (and hence its dispersion) to try to improve poor V-A coupling, a reduction in CCE will occur until it becomes negative. In other words, the lower the CCE, the higher the energy expenditure and the poorer the interplay between pump function and the vascular system (i.e., poor V-A coupling) to generate a given stroke volume [E6]. CCE is usually comprised between -1 and 1, but more negative values are exceptionally encountered.

**References for the appendix on CCE**

E1. Starling MR (1993) Left ventricular-arterial coupling relations in the normal human heart. Am Heart J 125:1659-1666.

E2. van den Horn GJ, Westerhof N, Elzinga G (1985) Optimal power generation by the left ventricle. A study in the anesthetized open thorax cat. Circ Res 56:252-261.

E3. Suga H (2003) Cardiac energetics: from E(max) to pressure-volume area. Clin Exp Pharmacol Physiol 30:580-585

E4. Nichols WW and O'Rourke MF (2005) McDonald's Blood Flow in Arteries: Theoretic, Experimental, and Clinical Principles. New York: Hodder Arnold.

E5. Romano SM, Pistolesi M (2002) Assessment of cardiac output from systemic arterial pressure in humans. Crit Care Med 30:1834-1841

E6. Romano SM (2012) Cardiac cycle efficiency: a new parameter able to fully evaluate the dynamic interplay of the cardiovascular system. Int J Cardiol 155:326-327

**Electronic Table 1. Stroke volume (SV) estimated by three methods (pulmonary artery catheter, -PAC, Vigilance monitor -; echocardiography, -echo-; pulse wave analysis, -PWA-).**

| **Method** | **N** | **Mean ± SD (ml)** | **Median** | **Range** |
| --- | --- | --- | --- | --- |
| **PAC-SV*** | 21 | 67.9 ± 21.8 | 65 | 21 - 114 |
| **Echo-SV*** | 21 | 61.9 ± 20.4 | 60 | 18 - 108 |
| **PWA-SV*** | 21 | 66.5 ± 18.1 | 65 | 21 - 105 |
| **Echo-SV** | 70 | 63.9 ± 22.0 | 63 | 18 - 108 |
| **PWA-SV** | 70 | 67.8 ± 21.5 | 66 | 19 - 110 |

*Data are referred to 21 of the 70 patients who were equipped with the pulmonary artery catheter (PAC, Vigilance monitor).

**Electronic Table 2. Agreement between stroke volume (SV) values estimated by the three methods.**

| **Methods** | **N** | **Mean Bias** ± **SD (ml)** | **95% LoA** | **r** | **PE (%)** |
| --- | --- | --- | --- | --- | --- |
| **PAC-SV vs Echo-SV*** | 21 vs 21 | +6.0 ± 10 | -13.7 to +25.7 | 0.88 | 30 |
| **PAC-SV vs PWA-SV*** | 21 vs 21 | +1.3 ± 8.5 | -15.2 to +17.9 | 0.92 | 25 |
| **Echo-SV vs PWA-SV*** | 21 vs 21 | -5.2 ± 9.0 | -22.9 to +12.5 | 0.88 | 28 |
| **Echo-SV vs PWA-SV** | 70 vs 70 | -3.8 ± 9.9 | -23.3 to +15.6 | 0.89 | 30 |

* Data are referred to 21 patients equipped with the pulmonary artery catheter (PAC, Vigilance monitor). LoA = limits of agreement (Bias ± 1.96*SD); r = Pearson’s linear regression; PE = Percentage error.

**Electronic figure 1:** **Computation of arterial pressure dP/dt dtMAX**

**
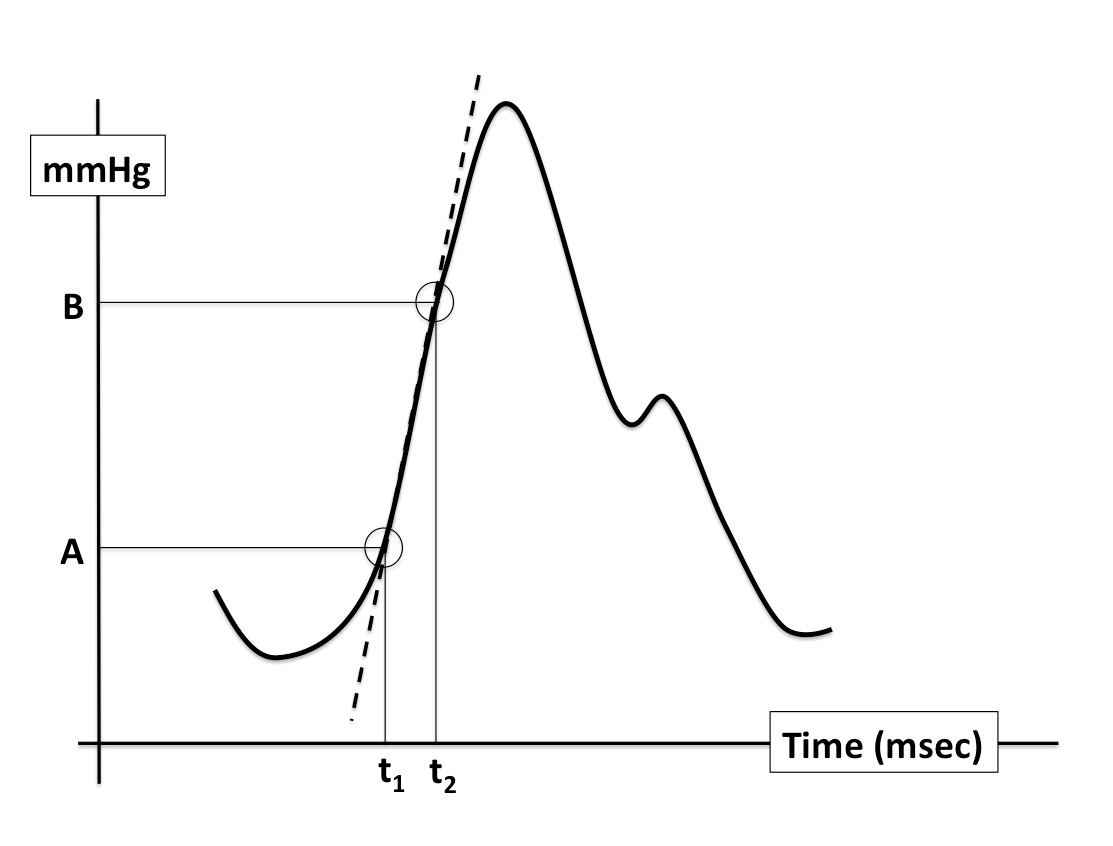
**

The computation of arterial pressure dP/dt dtMAX (AP-dP/dtMAX). AP-dP/dtMAX is estimated from the arterial pressure waveform as the maximal rate of pressure change (slope of dotted line) measured between two consecutive points (A and B) over time (t1 and t2) during the systolic upstroke and is expressed in mmHg/msec.

**Electronic figure 2: Relation between left ventricular ejection fraction (LVEF) and cardiac cycle efficiency (CCE) in patients with normal LV function**

**
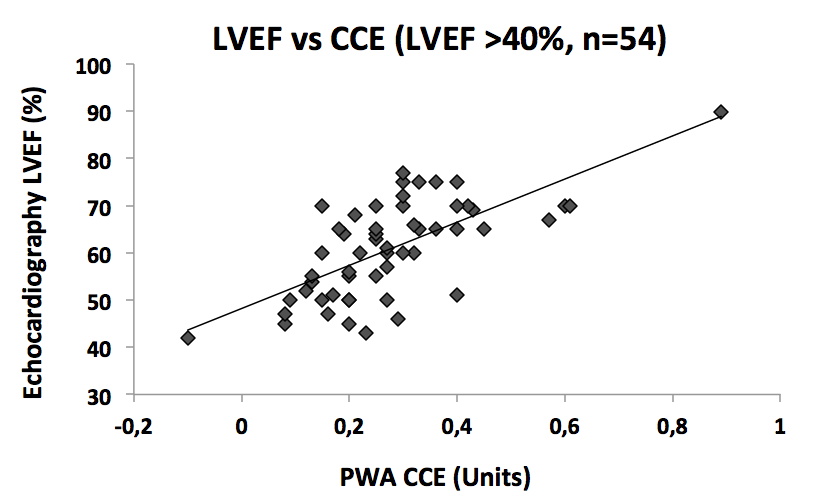
**

The correlation between left ventricular ejection fraction (LVEF) and cardiac cycle efficiency (CCE) conducted for 54 patients with a LVEF >40%. A significant correlation was found (r = 0.67, 95% CI 0.51 to 0.80, P<0.001).

**Electronic figure 3: Relation between left ventricular ejection fraction (LVEF) and cardiac cycle efficiency (CCE) in patients with decreased LV function**

**
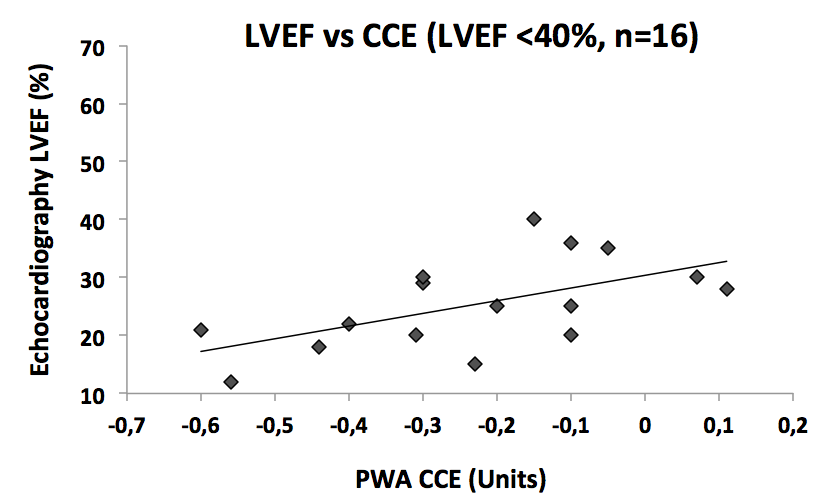
**

Relation between left ventricular ejection fraction (LVEF) and cardiac cycle efficiency (CCE) in 16 patients with a LVEF ≤40%. There is a significant correlation between LVEF and CCE (r = 0.59; 95% CI 0.31 to 0.83, P<0.01).

**Electronic figure 4:** **Relation between arterial-ventricular coupling (Ea/Ees) computed using peripheral dicrotic notch and cardiac cycle efficiency (CCE)**

**
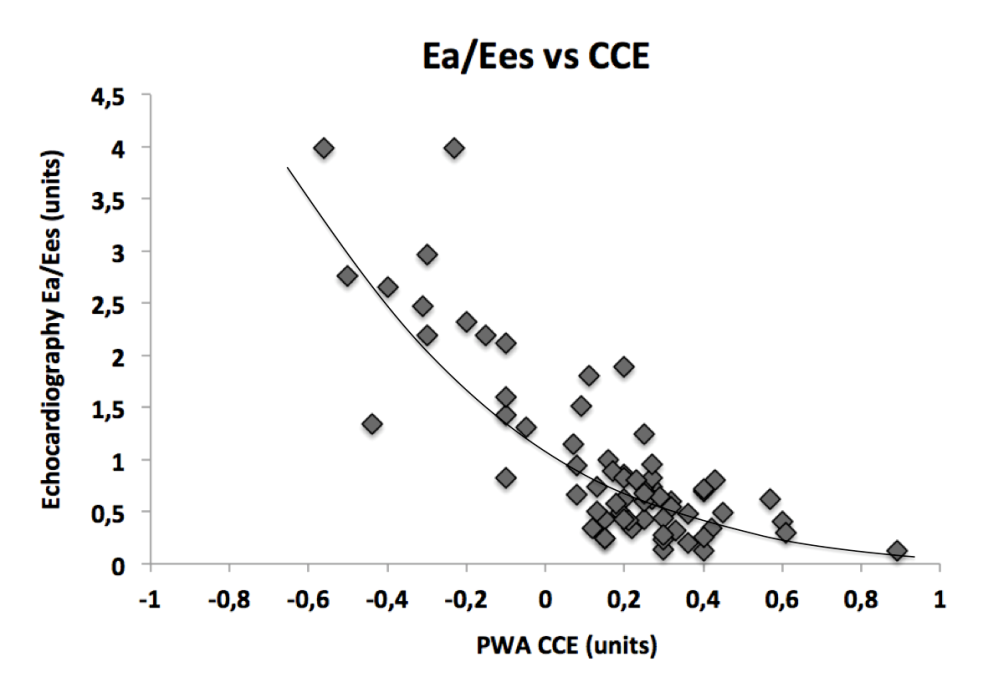
**

Arterial-ventricular coupling (Ea/Ees) was estimated by echocardiography and cardiac cycle efficiency (CCE) obtained with pulse wave analysis (PWA). In contrast to figure 3 of the main manuscript, Ees was calculated using the peripheral dicrotic pressure instead of estimation from systolic arterial pressure. Ea/Ees and CCE were inversely related (r = -0.78, 95% CI -0.67 to -0.86, *P*<0.001).

**Electronic figure 5:** **Relation between left ventricular ejection fraction (LVEF) and cardiac cycle efficiency (CCE) in septic patients**

**
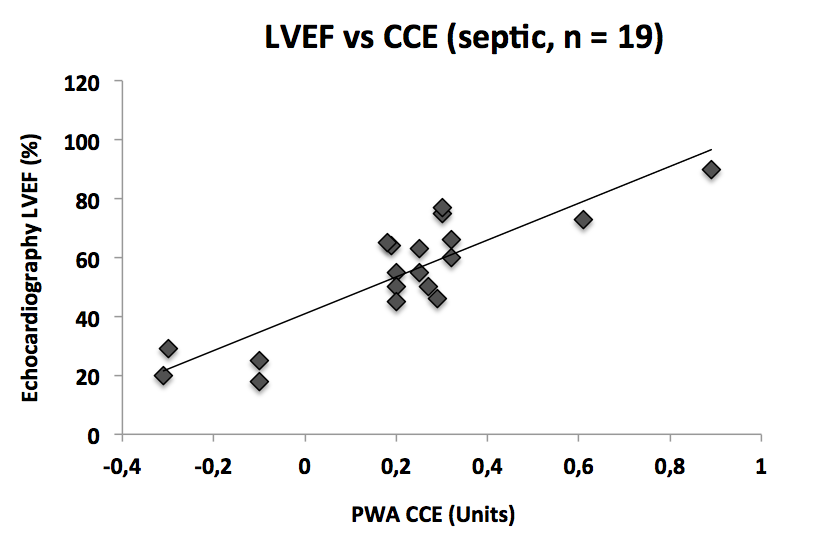
**

Relation between left ventricular ejection fraction (LVEF) and cardiac cycle efficiency (CCE) conducted for 19 septic patients. A significant correlation was found (r = 0.90, 95% CI 0.69 to 0.95, P<0.001).

**Electronic figure 6:** **Relation between dP/dt estimated by echocardiography and pulse wave analysis in septic patients**

**
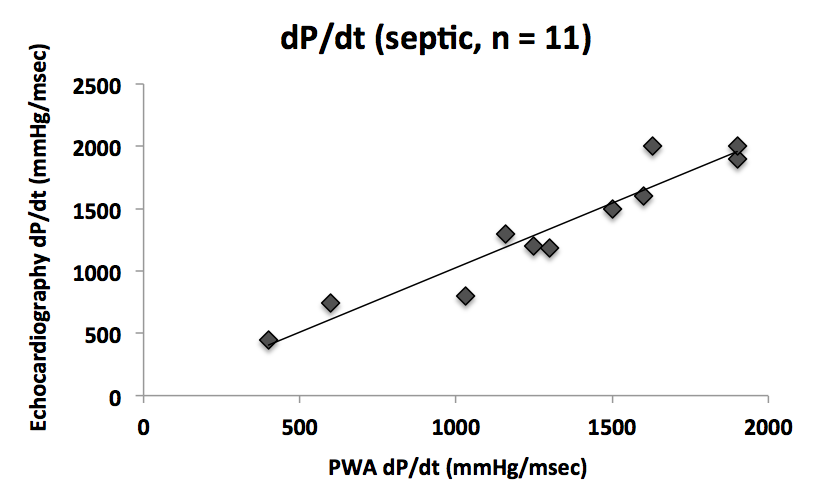
**

Correlation between dP/dt estimated by echocardiography and pulse wave analysis (PWA) in 11 septic patients who had mitral valve regurgitation (r = 0.95, 95% CI 0.83 to 0.98, p <0.0001).

**Electronic figure 7:** **Relation between arterial-ventricular coupling (Ea/Ees) and cardiac cycle efficiency CCE in septic patients.**

**
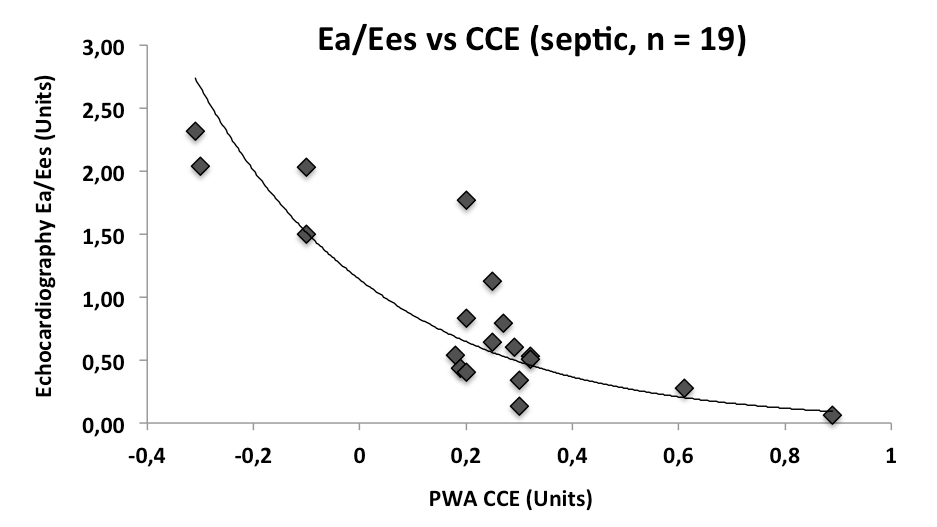
**

Relation between arterial-ventricular coupling (Ea/Ees) estimated by echocardiography and cardiac cycle efficiency (CCE) estimated by pulse wave analysis (PWA) in 19 septic patients. A significant inverse correlation was found (r = -0.82, 95% CI -0.59 to -0.82, p <0.0001).

**Electronic figure 8:** **Relation between left ventricular ejection fraction (LVEF) and cardiac cycle efficiency (CCE) in patients with low systemic vascular resistances**

**
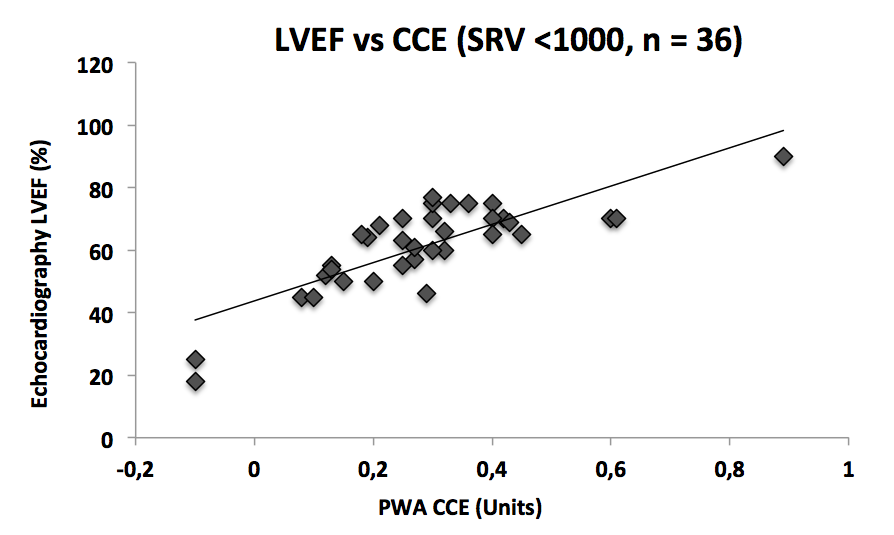
**

Relationship between left ventricular ejection fraction (LVEF) and cardiac cycle efficiency (CCE) in 36 patients with low systemic vascular resistances (SVR <1000 dyn.s.cm−5). There was a significant correlation between LVEF and CCE (r = 0.80, 95% CI 0.64 to 0.89, p <0.0001).

**Electronic figure 9: Relation between dP/dt estimated by echocardiography and pulse wave analysis (PWA) in patients with low systemic vascular resistances**

**
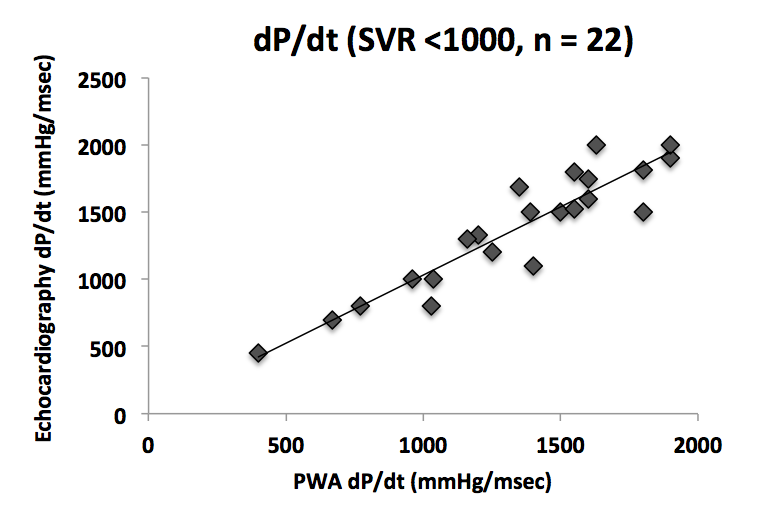
**

Correlation between dP/dt estimated by echocardiography and pulse wave analysis (PWA) in 22 patients who had low systemic vascular resistances (SVR <1000 dyn.s.cm−5) and mitral valve regurgitation (r = 0.92, 95% CI 0.82 to 0.96, p <0.0001).

**Electronic figure 10: Relation between arterial-ventricular coupling (Ea/Ees) estimated by echocardiography and cardiac cycle efficiency (CCE) in patients with low systemic vascular resistances**

**
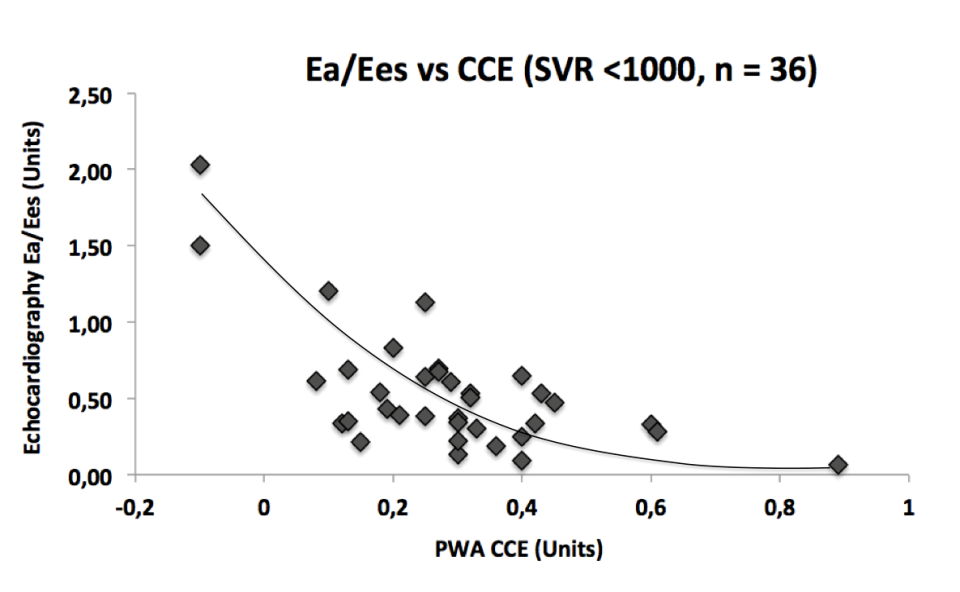
**

Relation between arterial-ventricular coupling (Ea/Ees) estimated by echocardiography and cardiac cycle efficiency (CCE) estimated by pulse wave analysis (PWA) in 36 patients who had low systemic vascular resistances (SVR <1000 dyn.s.cm−5). There was a significant inverse correlation between the two variables (r = -0.63, 95% CI -0.38 to -0.79, p <0.0001).

**Electronic figure 11: Relation between left ventricular ejection fraction (LVEF) and cardiac cycle efficiency (CCE) in patients treated with norepinephrine.**

**
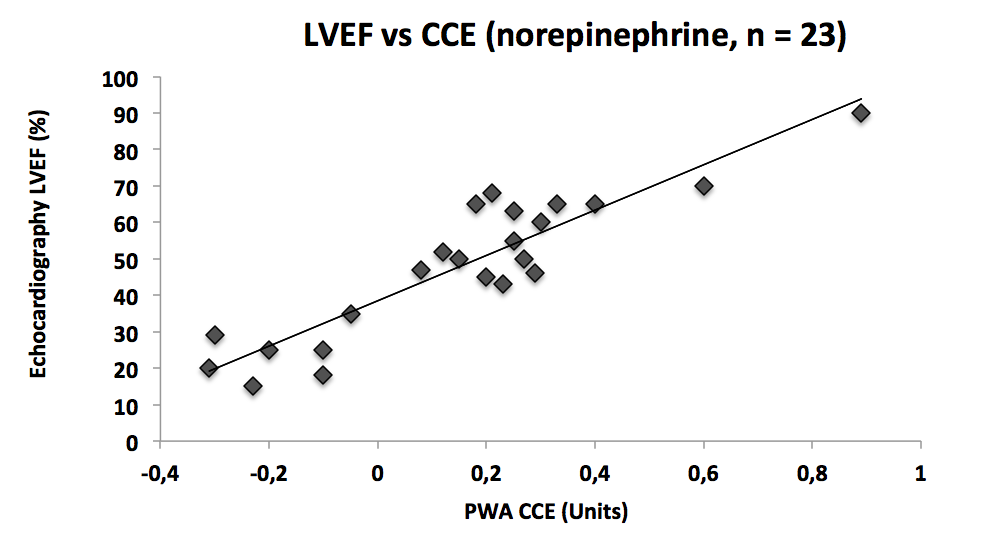
**

Relation between left ventricular ejection fraction (LVEF) and cardiac cycle efficiency (CCE) conducted for 23 patients with norepinephrine infusion. There was a significant correlation between the two variables (r = 0.91, 95% CI 0.79 to 0.96, p <0.0001).

**Electronic figure 12: Correlation between dP/dt estimated by echocardiography and pulse wave analysis in patients treated with norepinephrine**

**
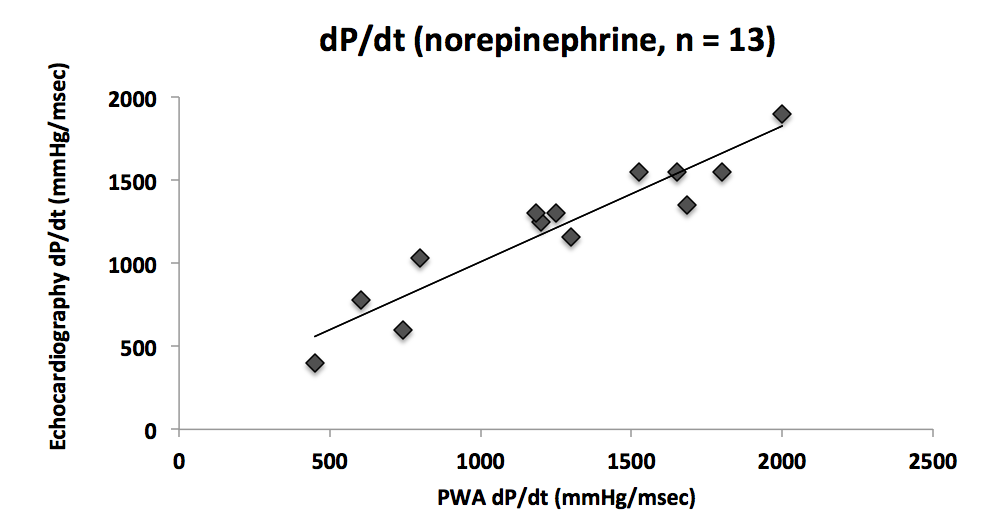
**

Correlation between dP/dt estimated by echocardiography and pulse wave analysis (PWA) in 13 patients with norepinephrine infusion and mitral valve regurgitation (r = 0.94, 95% CI 0.82 to 0.98, p <0.0001).

**Electronic figure 13: Relation between arterial-ventricular coupling (Ea/Ees) and cardiac cycle efficiency (CCE) in patients treated with norepinephrine**

**
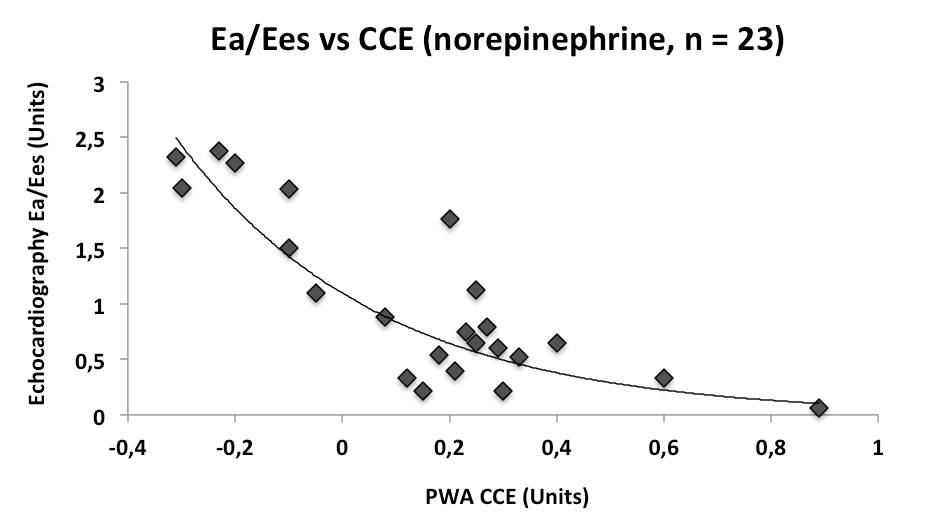
**

Correlation between arterial-ventricular coupling (Ea/Ees) estimated by echocardiography and cardiac cycle efficiency (CCE) estimated by pulse wave analysis (PWA) in 23 patients with norepinephrine infusion (r = -0.81, 95% CI -0.72 to -0.89, p <0.0001).

**Electronic figure 14:** **Underdamped arterial pressure waveform of a study patient.**


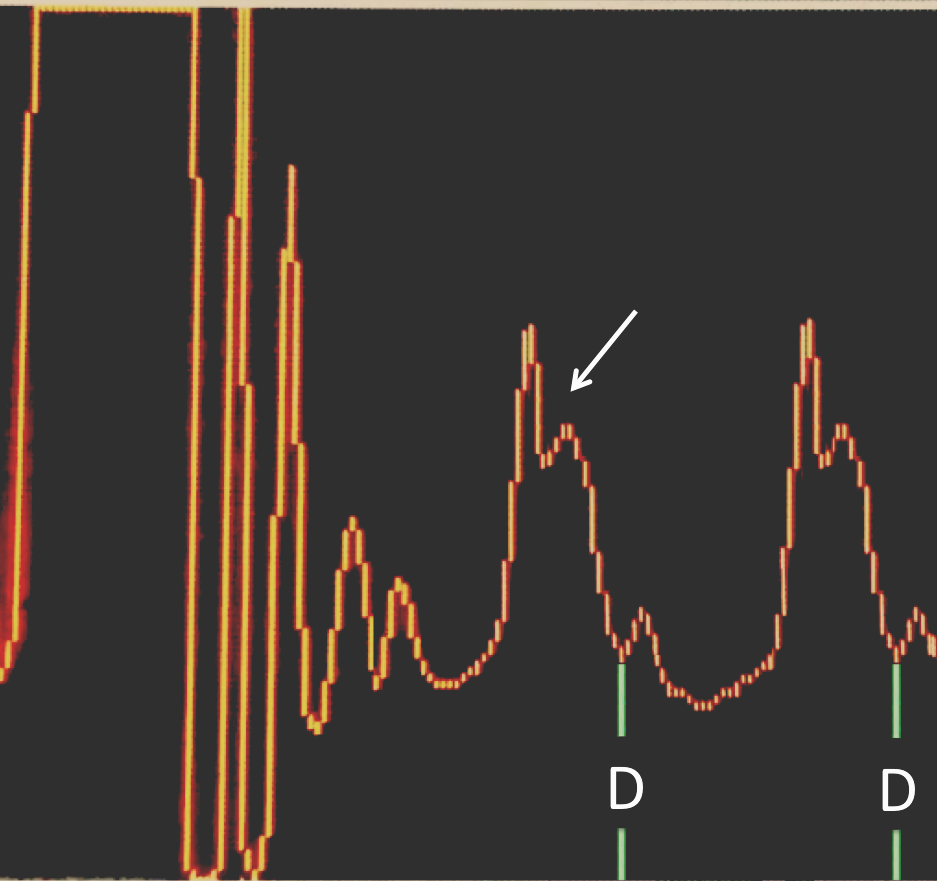


The fast-flush maneuver (square waveform test = pull and release the fast-flush valve of the transducer of the arterial line) shows a rapid response of the catheter-transducer system with superimposed oscillations, followed by a steep rise in the systolic pressure. The arrow indicates an overshoot in the systolic phase of the pressure wave. Vertical green lines under the two curves represent the detection of the incisura (dicrotic notch, D), which identifies aortic valve closure.

**Electronic figure 15:** **Underdamped arterial pressure waveform of a study patient.**

**
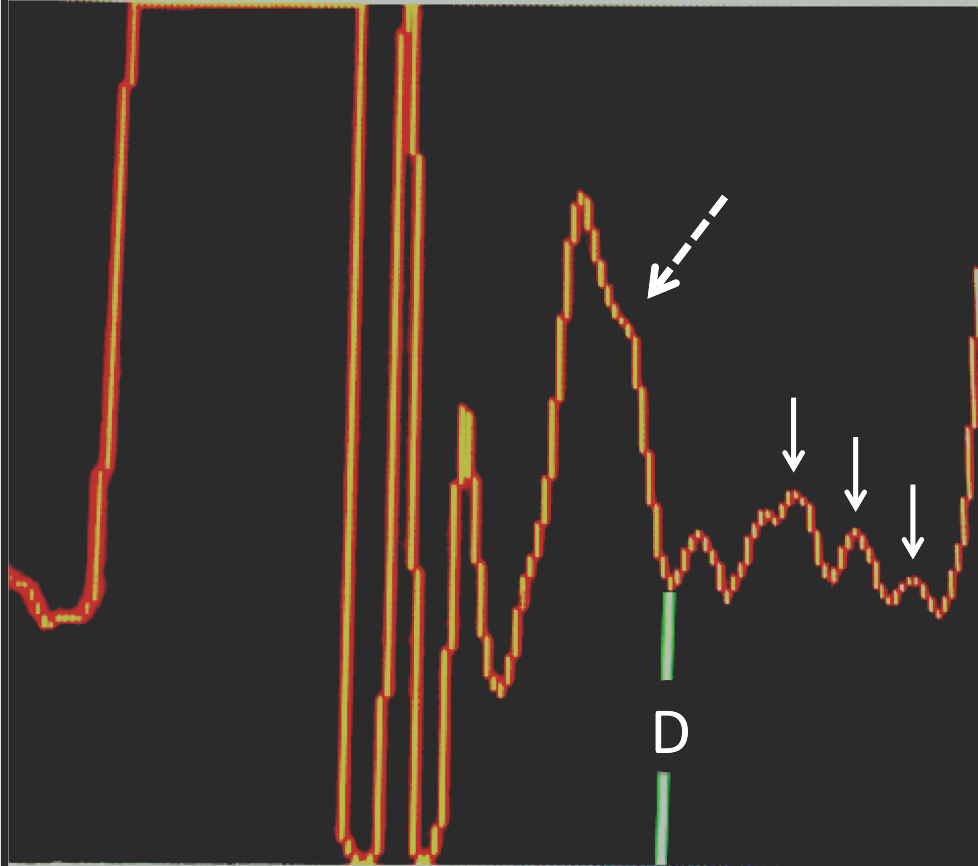
**

The square waveform test reveals large superimposed oscillations. The dashed arrow indicates the systolic pressure overshoot. Additional non-physiologic pressure waves (three arrows) follow the dicrotic notch (D) in the diastolic run-off of the pressure wave producing a distortion in the shape of the pressure curve.

**Electronic figure 16: Optimally damped arterial pressure waveform of a patient of the study.**

**
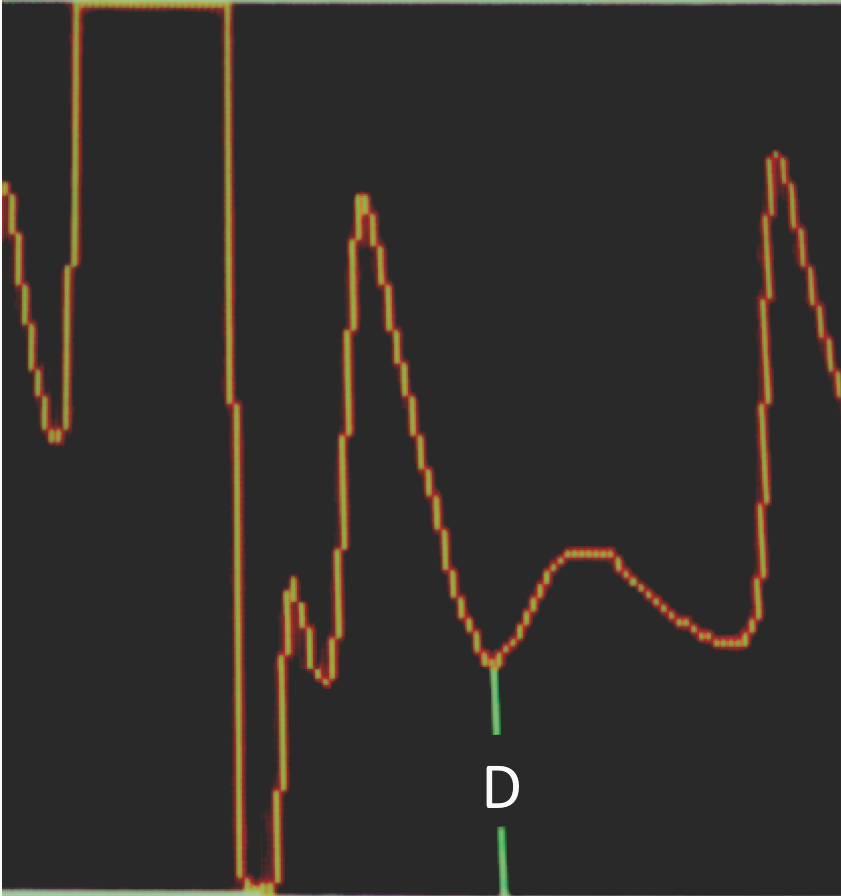
**

Changes in morphology of the pressure wave shown in E-figure 15, after positioning the resonance over-shoot eliminator (R.O.S.E., Becton Dickinson, Becton Drive, NJ). The fast-flush test reveals a small overshoot and no oscillations, then follows the arterial trace without artefacts either in the systolic phase or in the diastolic run-off.

**Electronic figure 17:** **Measurement of cardiac cycle efficiency (CCE) by pulse wave analysis.**


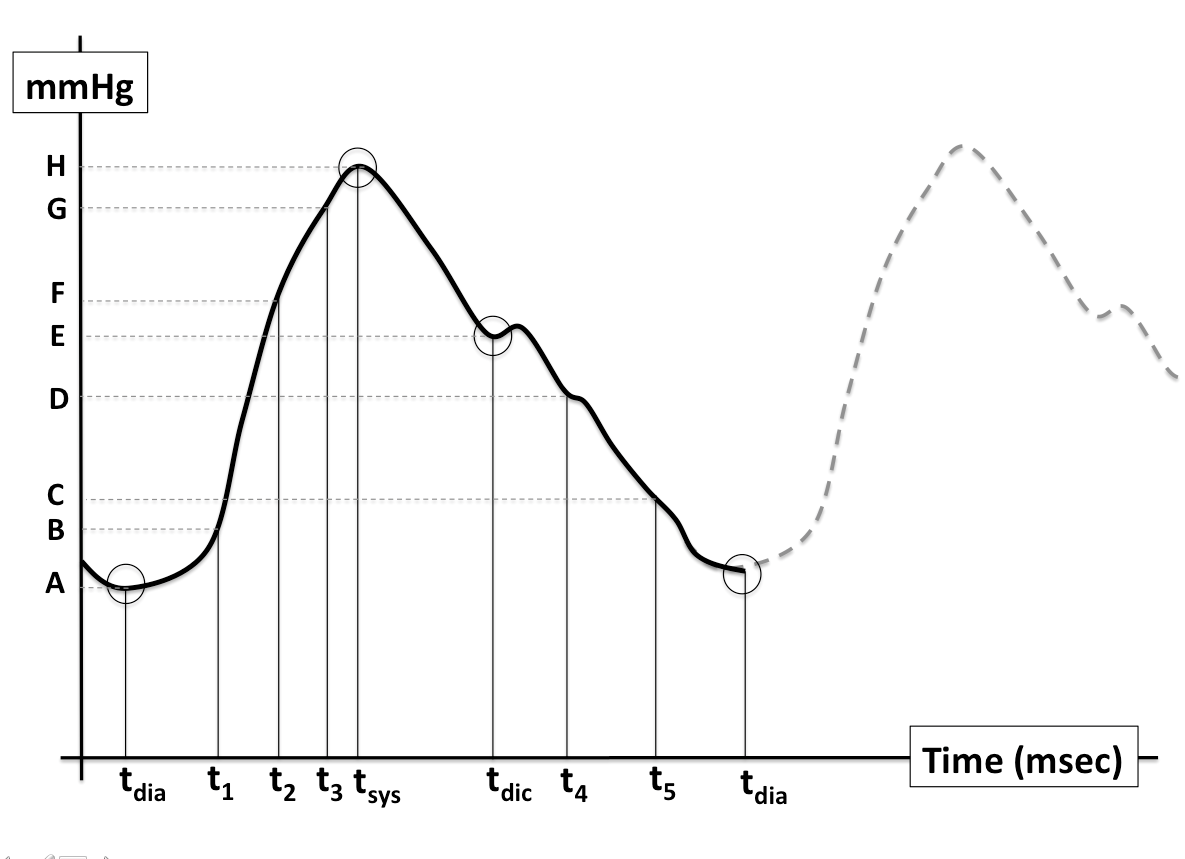


Briefly, a number of systolic-phase pressure points are generated using pressure changes divided by the time-lapse during which these changes occur (A-tdia, B-t1, F-t2, G-t3, … H-tsys, E-tdic, expressed in mmHg/msec). Each of these points represents energy related to stroke volume and one or several reflected pressure waves from the periphery. The same approach is also conducted for the whole beat (A-tdia, E-tdic, D-t4, C-t5, ... A-tdia). CCE is then computed as the ratio of the sum of systolic powers [*W(t)sys*] to the sum of all powers of the entire cycle [*W(t)beat*] (See Appendix on CCE for details).
